# Supplementary material
Source: Research Square preprint supplement (doi:10.21203/rs.3.rs-9361934/v1)
Supplement: Supplementary file 1 [file 101323821a2c2054a5493544.docx]

**Table S1 Commercially cultivated varieties used in this study**

| No. | **Commercially cultivated varieties** |
| --- | --- |
| 1 | Taiyou390 |
| 2 | Yuxiangliangyoufuxiangzhan |
| 3 | Quanxiangyou822 |
| 4 | Wudayou No.2 |
| 5 | Yexiangyoubasi |
| 6 | Chuxiangyou55 |
| 7 | Dafengyou101 |
| 8 | Fuxiangliangyouxiang99 |
| 9 | qingxiangyou19xiang |
| 10 | Sixiangyou908 |
| 11 | Teyou3301 |
| 12 | Teyou458 |
| 13 | Teyou3550xuan |
| 14 | Teyou138 |
| 15 | Teyou2068 |
| 16 | Shennongdao |
| 17 | Guyou301 |
| 18 | Liuxiangyougongsixiang |
| 19 | Jingqiyou |
| 20 | Teyou506 |
| 21 | Teyou8009 |
| 22 | Teyou8087 |
| 23 | GUangliangxingui |
| 24 | Teyou211 |
| 25 | Teyou600 |
| 26 | Daoxiangyou619 |
| 27 | 10Xiangyouyuxiang |
| 28 | Teyou9516 |
| 29 | Genxiangyouyinzhan |
| 30 | YLiangyou1173 |
| 31 | Fuxiangliangyou19xiang |
| 32 | Lanxiangyouyusi |
| 33 | Jingruanyoudaizhan |
| 34 | Quanxiangyou136 |
| 35 | Guinongfeng |
| 36 | Liuxiangyouzhaoxiangsimiao |
| 37 | Guangliangxiangsi |
| 38 | Quanyousimiao |
| 39 | Wushansimiao |
| 40 | Zhenyeyousimiao |
| 41 | Yunliangyou332 |
| 42 | Zhenliangyouyuzhan |
| 43 | Jingliangyouhuazhan |
| 44 | Fuxiangsiliuxianger |

**Table S2 The prime used in this study**

| Gene | Prime F | Prime R |
| --- | --- | --- |
| *OsActin1* | TTCCAGCCTTCCTTCATA | AACGATGTTGCCATATAGAT |
| *OsHMA1* | GGGCTAGGACTTATGGTTGC | CACATGAGCTTCCCTGTTGT |
| *OsHMA2* | GGAGGTGTCAGAAGAGCTAC | TTGACGATTTGGGATTGGGA |
| *OsHMA3* | GTCCTTCTTCGAGTGGCTCT | GGTGGTGAAGAGGAAGACGA |
| *OsHMA4* | GTCCCTGTTGATGGTGTTGT | CTTCTGAACTGGAGCCCTTG |
| *OsHMA5* | TGGAAGGCAGCAGCATAGAC | TGATGAGCCGTGGGATAACG |
| *OsHMA6* | TGGCTCAATTGGAATGACTG | ACCTCAGCTCTAACATCCTC |
| *OsHMA7* | GGTATCCAGGCAGACAAGGT | ACCAACACCTCCACCCATAG |
| *OsHMA8* | TTGAAGCTCGCTGTGGATGT | CCCTTTGTTAGCGTCCCTGT |
| *OsHMA9* | GTTGTGATTGCTTGCCCTTG | CCTTGTGTTAGTGTGCCTGT |
| *OsZIP1* | TCTGTTTCCACTCCGTCTTT | GAATATCTTGTGCAGCCCGA |
| *OsZIP2* | CACCGGCATCTTCATCTACG | AGGTGTCCCAGATCATGACG |
| *OsZIP3* | CCAGTTCTTTGAAGGTGTAGG | CGGGTTATTGAAATCTGTTGCT |
| *OsZIP4* | GCGACTTTCTTCTCCCTCAC | GGCAAGCAGAGACATCATCC |
| *OsZIP5* | CAGGCAAAGTTCCGTGTCAG | CGCCATGTAGACGAGTATCC |
| *OsZIP6* | GAGGAGGAAGCAGAAGATGG | GTCACCGAGAACATTACGCA |
| *OsZIP7* | GGACGACAACGACAACAAGG | CATCTCAAGTATCTGCGACACC |
| *OsZIP8* | CCTCAGCACGTCCATCGG | GGCCCTTCATGGATCCCAAA |
| *OsZIP9* | CGCCTACAATGAGAATAGCC | TCAAGCCCAAATACCAAGCA |
| *OsZIP10* | GGGAATTGTATCTCACTCGGTC | TAGCAAAGAAGAAAGCCATCAG |
| *OsZIP11* | CACAACTCAGAAGATACAGCAG | GGAGGAATAAGGTGGTAAATAGAC |
| *OsZIP12* | GAACCGCGTCGTCGTTCAG | CCATCCCCTCGAACATCTGG |
| *OsZIP13* | CGGCATCGTGTCATCTCTCA | CCTCACCTTGAACTTCGCCT |
| *OsZIP14* | CACCACCATCACCATGAACAC | CCTGGAAGAAGATTACTGGGAG |
| *OsZIP15* | CGTTCCACACGCGGGGCAGCAAG | TGCGCCTTGGTGGTGTTACCG |
| *OsZIP16* | ATTGGTGGCCTTAGCACCTC | AAGAAATGCCGCAGTACCCA |
| *OsMTP11* | CACGCTCTGTCCCATGAAAA | GTTTCCTGACGAGCACCAG |
| *OsMTP8.1* | CCAACCATGACCACCAACTT | GCACGTACTGTAGCACATCC |
| *OsMTP9* | AGGCCGAGGTCTGAATTCTC | CACAGGGAAACGATGACTTGT |
| *OsMTP1* | CATTCAGATTGAGCGCGAGT | AGTTGGTCCCATGAGATGAGA |
| *OsMTP5* | ACCTGACCATCCAAACCGAT | ACTGCGAGAGTTTGATCTATCCT |
| *OsMTP6* | TGGGCCAGCAAATTAAGCAA | TCAACCGTGACAGTGTAGCT |
| *OsMTP7* | TGAAGCACACAACCCAGAAG | ACAGCAAGTGAGACCAATCG |
| *OsMTP8* | GCGTGCTTTTGTTCATGTGG | TGCACAAGAGTAAAACTGGAGC |
| *OsMTP11.1* | AGCTTACCTACCTGTGCTGG | ACAAAGTAGTGGGAGCCGAA |
| *OsMTP12* | GGCACTTTTCACCTTCATATCAC | TCTTGAATCCCAGCCTCATGA |
| *OsPCR1* | TGCAACACCTGTTGTATGGC | CGACGATTTCTGCGATCTGG |
| *OsNRAMP1* | CATCGGCATCGTGCTGTTC | TGGCTACCTGTGCTTTCTCG |
| *OsNRAMP5* | AGCAGCAGTAAGAGCAAGATGG | GGGGAGGTCGTTGTGGATG |


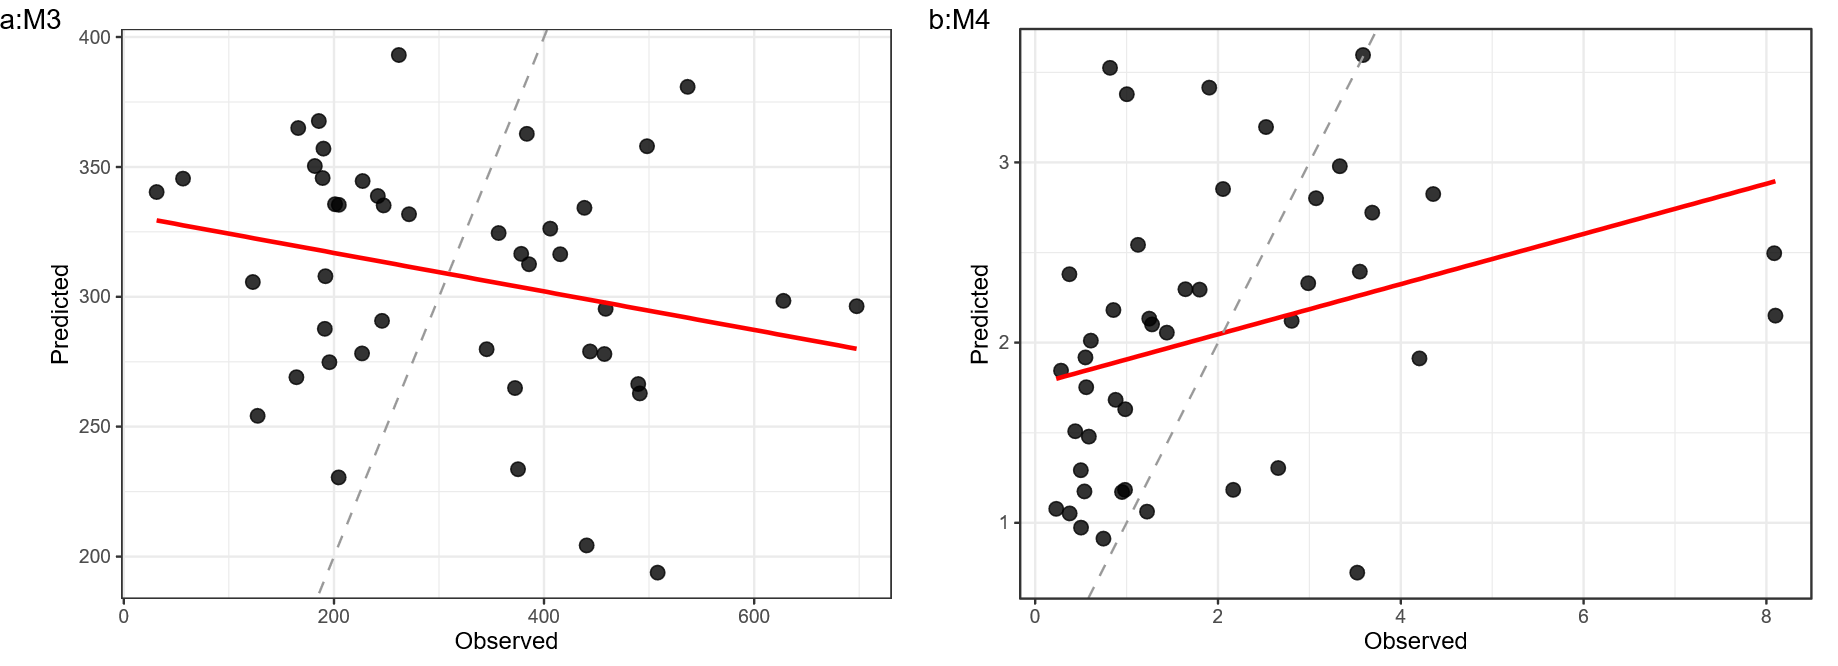


**Figure S1. Observed versus predicted values for sensitivity models M1-alt and M2-alt.** (a) M1-alt, in which the absolute shoot Cd concentration under Zn treatment (L Cd Conc_Z) was used as the response variable (OOB R² = 0.061, RMSE = 168.1 μg g⁻¹). (b) M2-alt, in which the absolute translocation factor under Zn treatment (TF_Z) was used as the response variable (OOB R² = 0.106, RMSE = 1.706). In both models, predictors were identical to those used in the primary classification models (M1 and M2), comprising baseline metal-status traits and Zn-induced physiological response variables. The lower predictive performance relative to the primary models is consistent with the greater background variance inherent in absolute endpoint values. Red lines indicate fitted regression lines; dashed lines indicate the 1:1 reference.


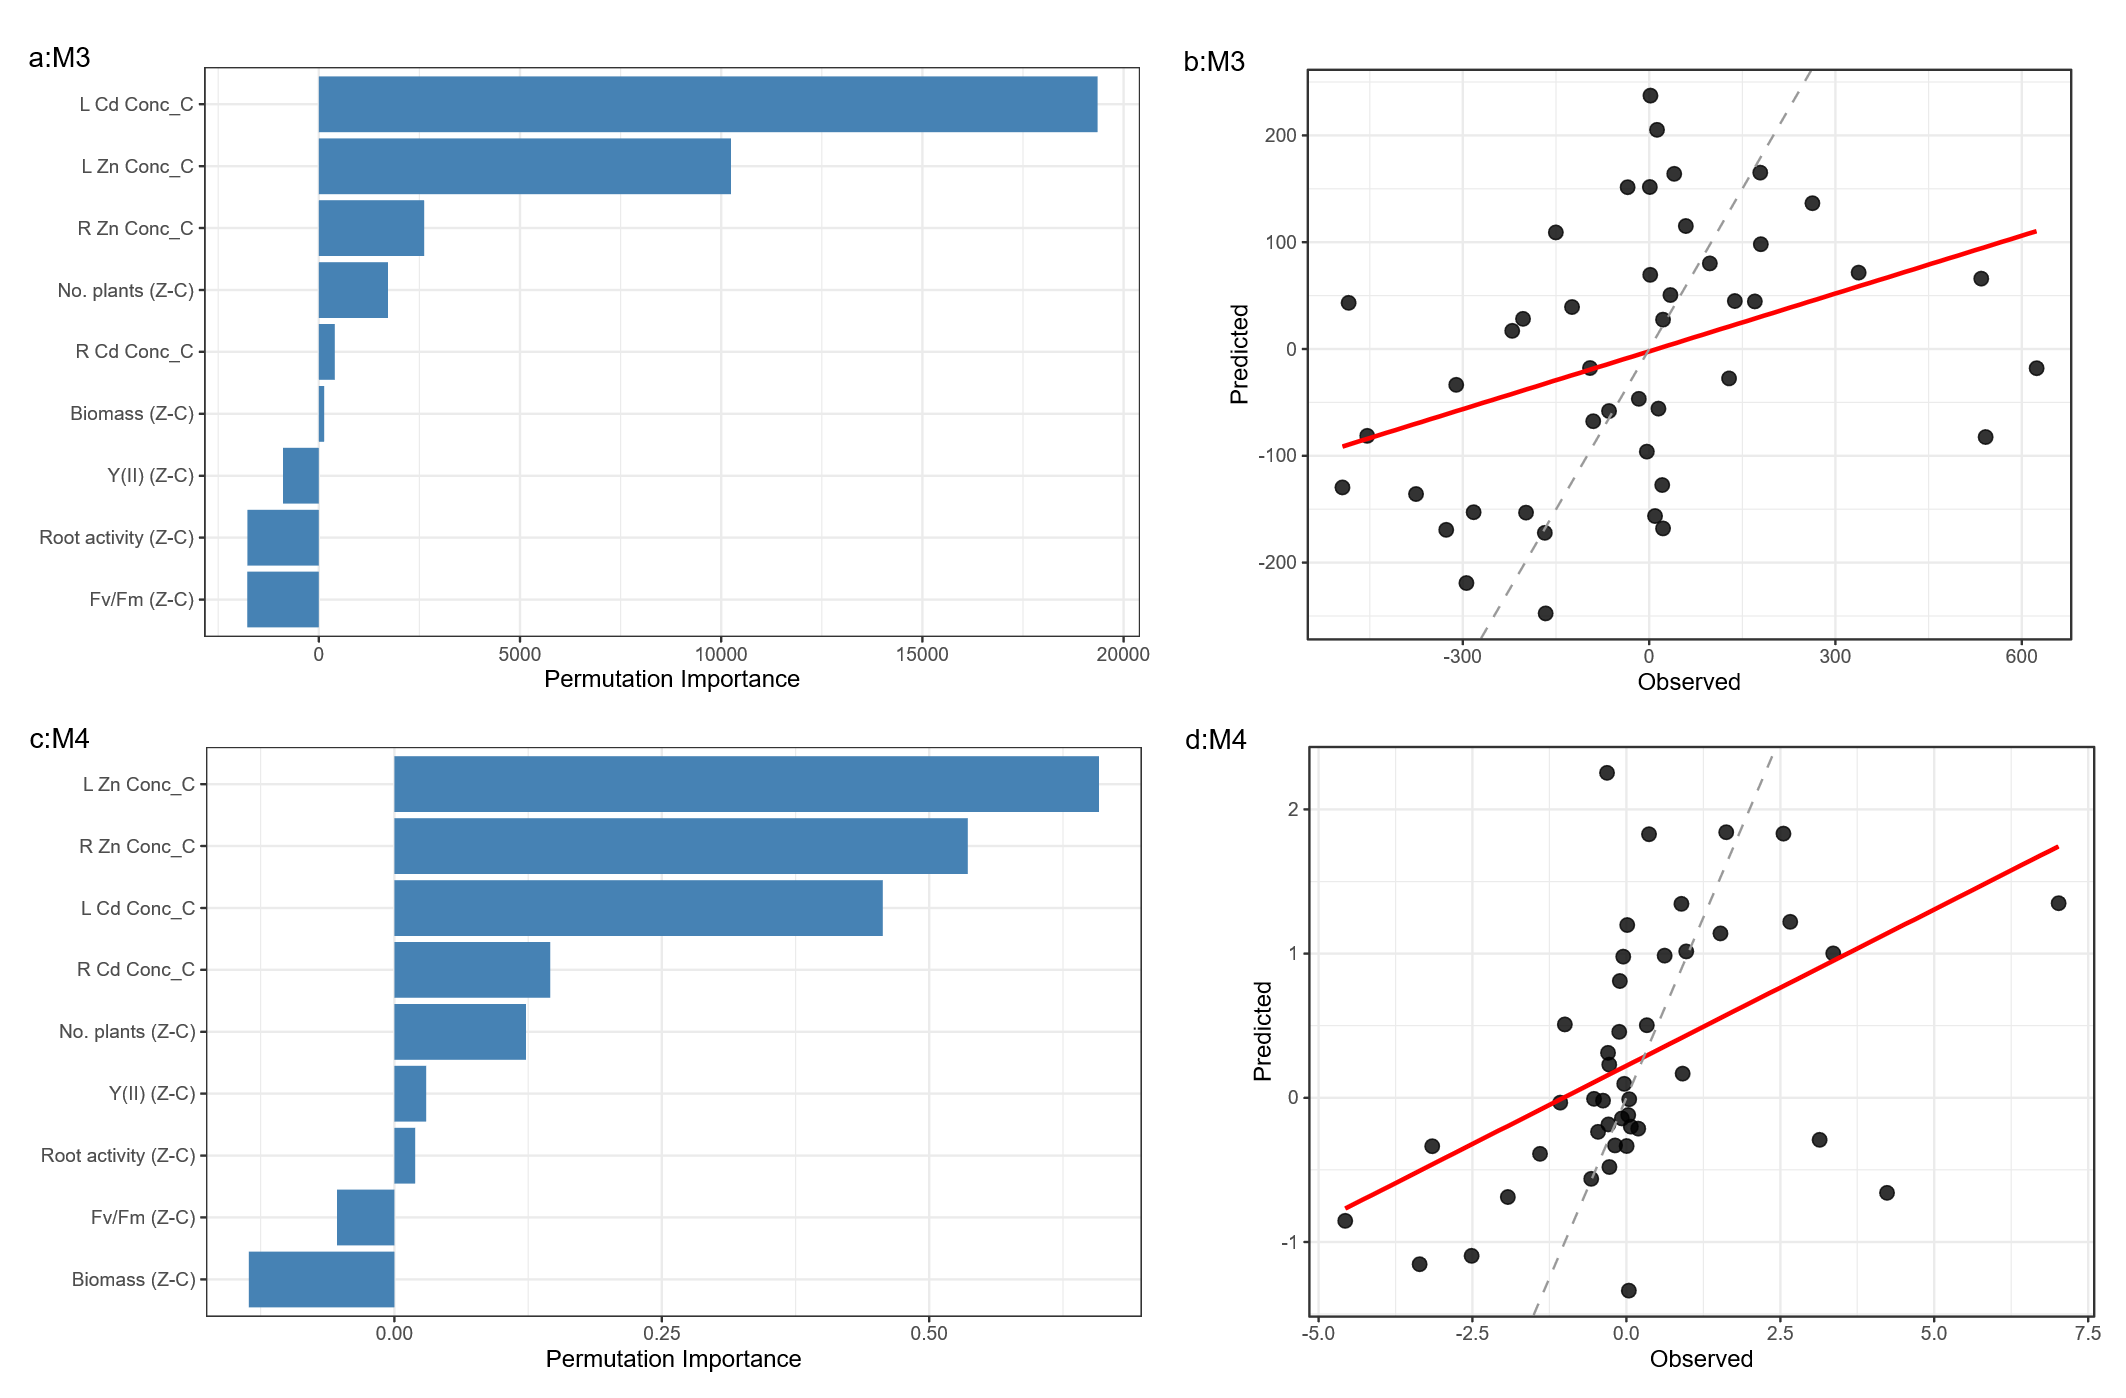


**Figure S2. Variable importance and predictive performance of regression models M3 and M4.** (a) Permutation importance rankings for M3 (ΔTotal Cd). (b) Observed versus predicted values for M3 (OOB R² = 0.138, RMSE = 233.0). (c) Permutation importance rankings for M4 (ΔTF). (d) Observed versus predicted values for M4 (OOB R² = 0.238, RMSE = 1.702). In both models, predictors comprised baseline metal-status traits and Zn-induced physiological response variables. Negative permutation importance values indicate variables whose inclusion degraded model predictions. Red lines indicate fitted regression lines; dashed lines indicate the 1:1 reference.


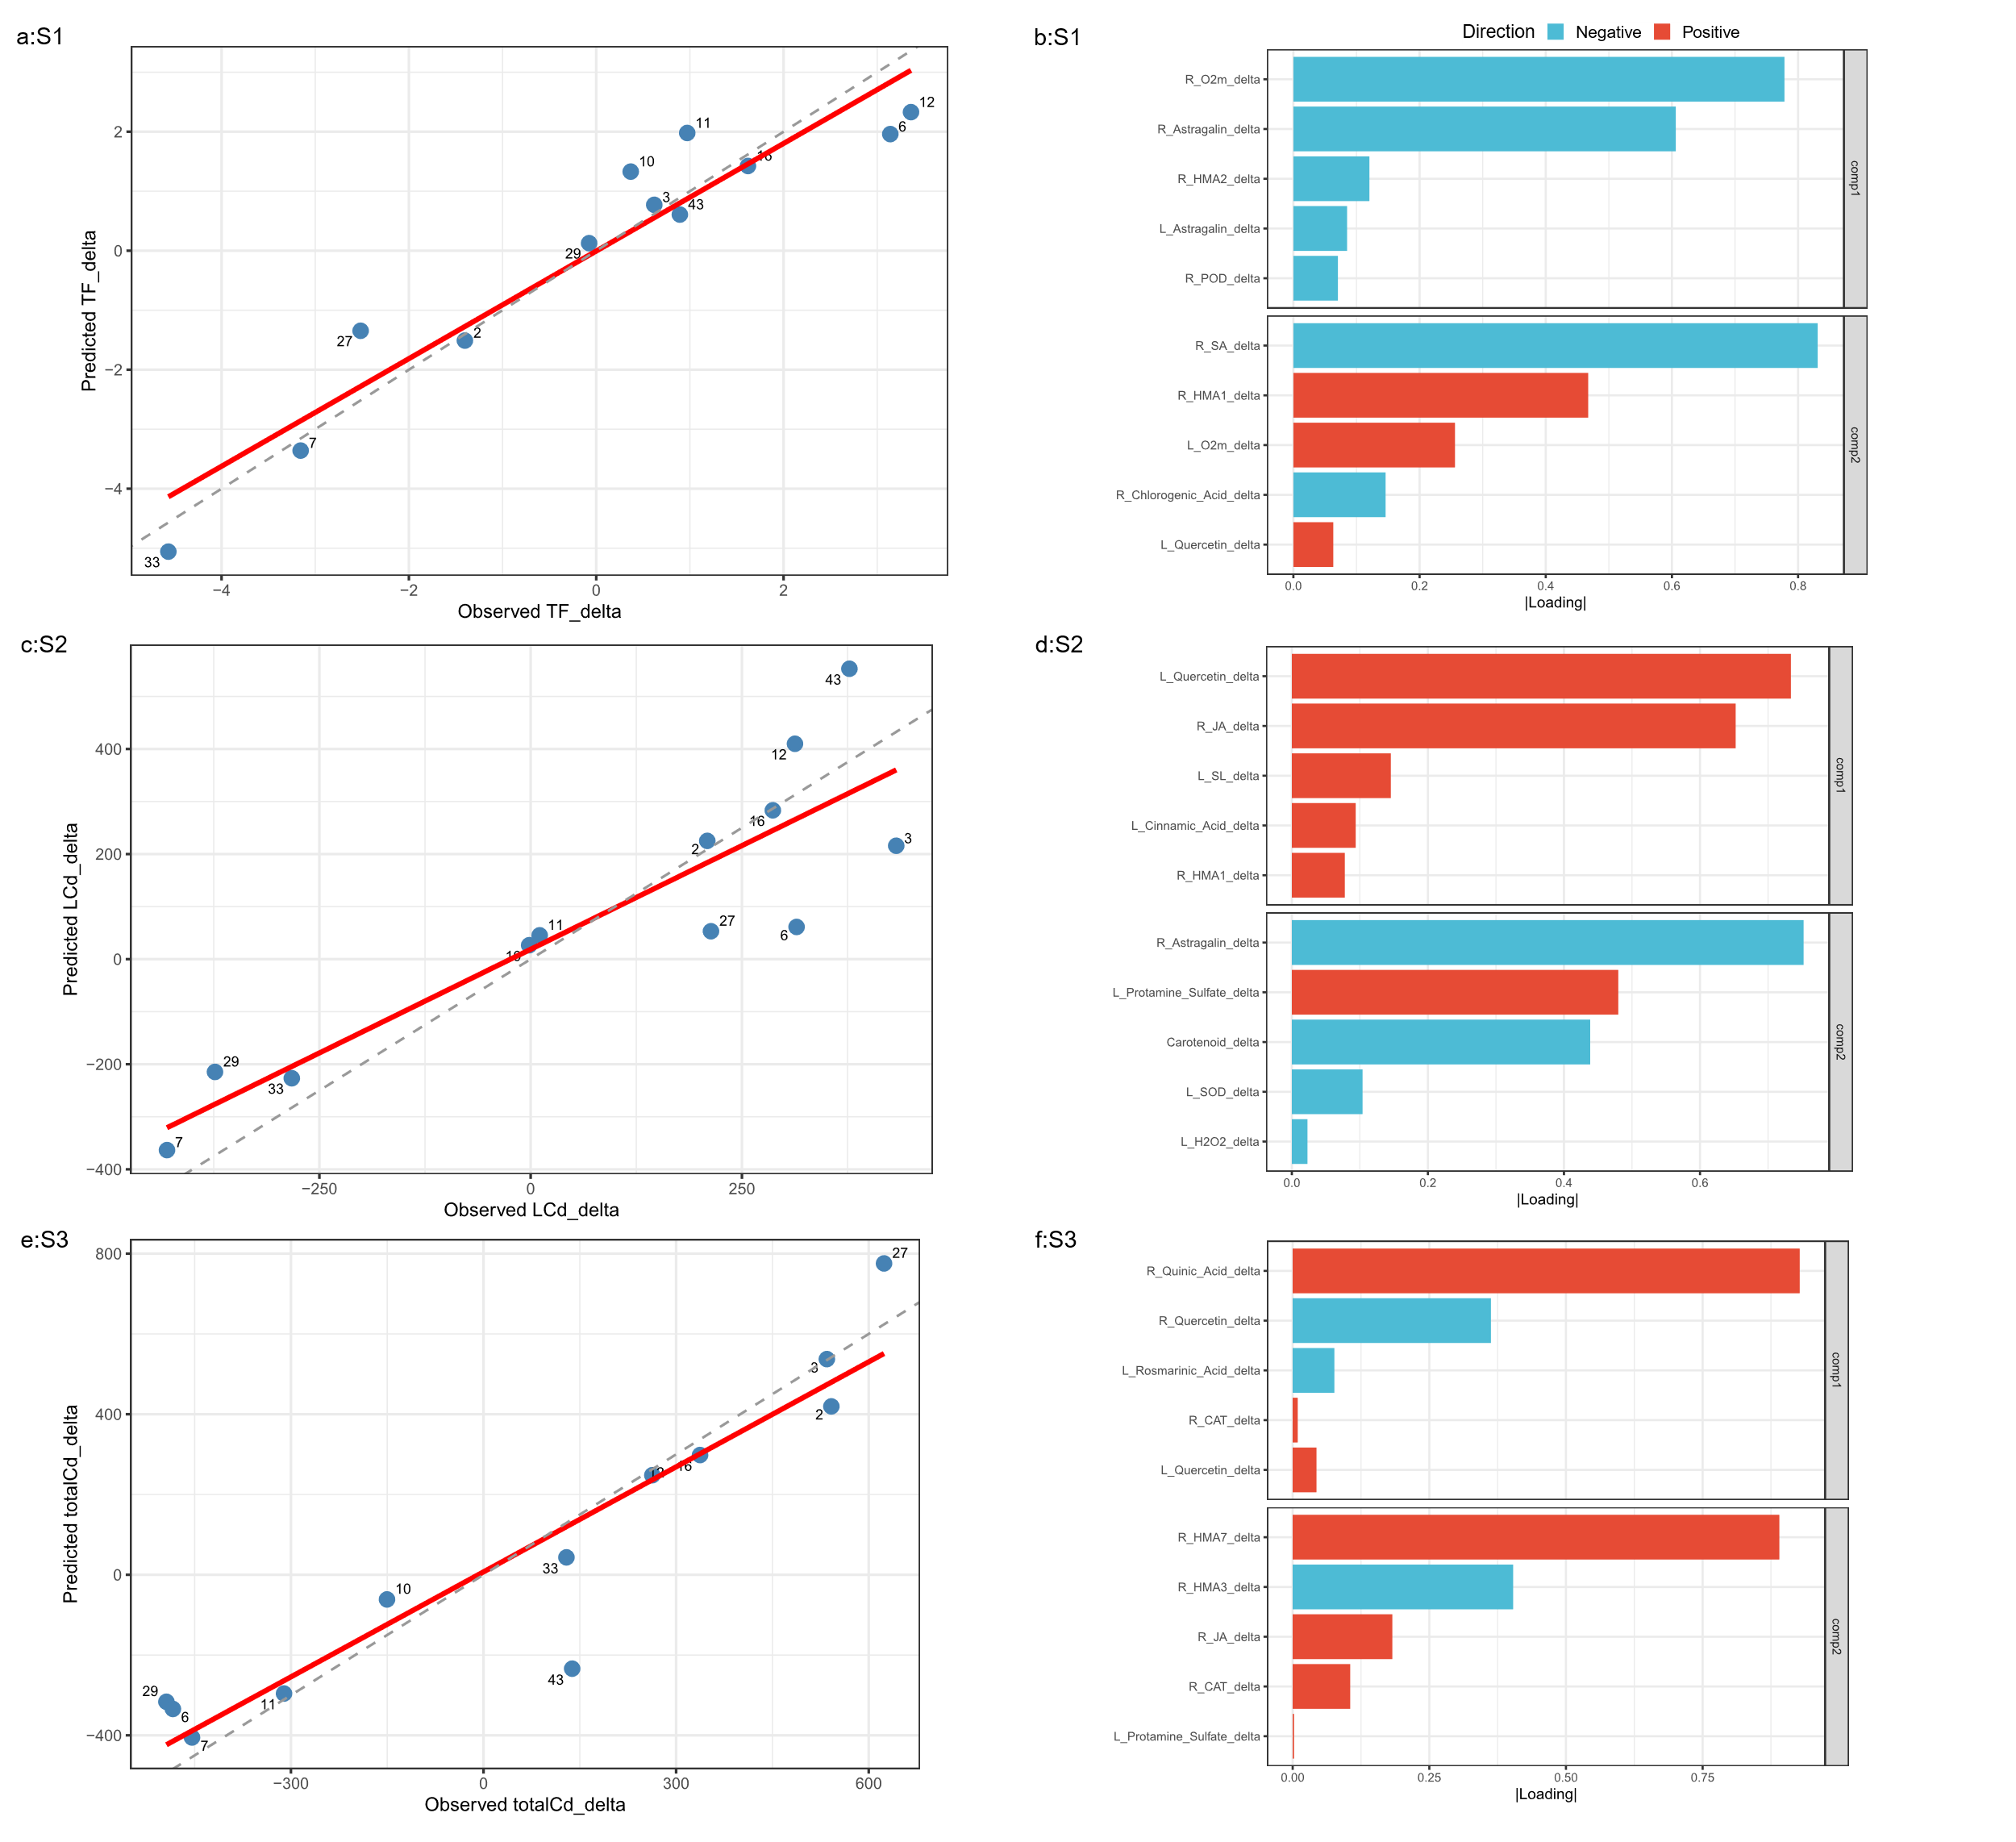


**Figure S3. Observed-versus-predicted relationships and comp1 loading structures of the three sPLS models.**

(a) Observed versus predicted values for S1 (TF_delta; R² = 0.871, RMSE = 0.836). (b) Non-zero comp1 loadings of the five retained variables in S1. (c) Observed versus predicted values for S2 (LCd_delta; R² = 0.896, RMSE = 93.647). (d) Non-zero comp1 loadings of the five retained variables in S2. (e) Observed versus predicted values for S3 (totalCd_delta; R² = 0.868, RMSE = 146.367). (f) Non-zero comp1 loadings of the five retained variables in S3. All models were fitted using 12 selected cultivars with two latent components.

**Table S3. Two-way ANOVA results for selected follow-up traits**

| **Variable** | **Effect** | **df** | **F** | **p value** | **q value** | **Sig.** |
| --- | --- | --- | --- | --- | --- | --- |
| L Cd Conc | Cultivar | 43 | 68.69 | 2.083e-89 | 2.916e-89 | *** |
| L Cd Conc | Treatment | 1 | 0.04 | 0.8317 | 0.8317 | ns |
| L Cd Conc | Cultivar × Treatment | 43 | 40.56 | 4.489e-71 | 7.855e-71 | *** |
| R Cd Conc | Cultivar | 43 | 218.27 | 9.595e-132 | 6.716e-131 | *** |
| R Cd Conc | Treatment | 1 | 36.12 | 1.042e-08 | 1.823e-08 | *** |
| R Cd Conc | Cultivar × Treatment | 43 | 46.86 | 5.226e-76 | 1.219e-75 | *** |
| L Zn Conc | Cultivar | 43 | 86.40 | 1.256e-97 | 2.198e-97 | *** |
| L Zn Conc | Treatment | 1 | 7.34 | 0.0074 | 0.0104 | * |
| L Zn Conc | Cultivar × Treatment | 43 | 54.82 | 1.879e-81 | 1.315e-80 | *** |
| R Zn Conc | Cultivar | 43 | 104.81 | 1.236e-104 | 4.326e-104 | *** |
| R Zn Conc | Treatment | 1 | 52.84 | 1.138e-11 | 3.981e-11 | *** |
| R Zn Conc | Cultivar × Treatment | 43 | 53.44 | 1.465e-80 | 5.126e-80 | *** |
| Biomass (g) | Cultivar | 43 | 97.31 | 6.187e-102 | 1.444e-101 | *** |
| Biomass (g) | Treatment | 1 | 72.39 | 7.471e-15 | 5.229e-14 | *** |
| Biomass (g) | Cultivar × Treatment | 43 | 18.94 | 1.189e-46 | 1.665e-46 | *** |
| Fv/Fm | Cultivar | 43 | 3.01 | 1.932e-07 | 1.932e-07 | *** |
| Fv/Fm | Treatment | 1 | 6.63 | 0.0108 | 0.0126 | * |
| Fv/Fm | Cultivar × Treatment | 43 | 4.42 | 1.318e-12 | 1.318e-12 | *** |
| Y (II) | Cultivar | 43 | 32.42 | 1.407e-63 | 1.642e-63 | *** |
| Y (II) | Treatment | 1 | 46.24 | 1.565e-10 | 3.653e-10 | *** |
| Y (II) | Cultivar × Treatment | 43 | 13.58 | 4.065e-37 | 4.742e-37 | *** |

Notes: P values and Benjamini–Hochberg-adjusted q values are shown for Cultivar, Treatment, and Cultivar × Treatment effects.Two-way ANOVA was performed for each variable with Cultivar, Treatment, and Cultivar × Treatment as fixed effects. Q values were obtained by Benjamini–Hochberg correction applied within each effect category.

Table S4
